# Supplementary material for: Adding Value to Goat Meat: Biochemical and Technological Characterization of Autochthonous Lactic Acid Bacteria to Achieve High-Quality Fermented Sausages
Source: PubMed Central journal article supplement (PMC5488097; doi:10.3390/microorganisms5020026), 2017-05-17
Supplement: microorganisms-05-00026-s001.pdf [file microorganisms-05-00026-s001.pdf]

**Table S1.** Growth and acidification ability of *Lactobacillus* isolates in the goat meat model system (MMS) at 30 °C after 24 h.

| Isolates | pH                       |           | Titratable acidity <sup>1</sup> |                    | Viability <sup>2</sup>  |
|----------|--------------------------|-----------|---------------------------------|--------------------|-------------------------|
|          | t24                      | t24       | t0                              | t24                | net growth <sup>3</sup> |
| UL12     | 3.7±0.06 <sup>A</sup>    | 1.50±0.01 | 7.1                             | 9.0 <sup>C</sup>   | 1.9 <sup>B</sup>        |
| UL94     | 3.8±0.01 <sup>AB</sup>   | 1.38±0.01 | 7.0                             | 8.0 <sup>ABC</sup> | 1.0 <sup>AB</sup>       |
| UL60     | 3.9±0.09 <sup>ABC</sup>  | 1.37±0.01 | 7.3                             | 8.0 <sup>ABC</sup> | 0.7 <sup>AB</sup>       |
| UL57     | 3.9±0.19 <sup>ABC</sup>  | 1.50±0.01 | 7.3                             | 8.5 <sup>ABC</sup> | 1.2 <sup>AB</sup>       |
| UL55     | 3.9±0.09 <sup>ABC</sup>  | 1.37±0.01 | 7.1                             | 8.0 <sup>ABC</sup> | 0.9 <sup>AB</sup>       |
| UL54     | 3.9±0.13 <sup>ABC</sup>  | 1.36±0.01 | 7.1                             | 8.0 <sup>ABC</sup> | 0.9 <sup>AB</sup>       |
| UL61     | 3.9±0.10 <sup>ABC</sup>  | 1.37±0.01 | 7.3                             | 8.0 <sup>ABC</sup> | 0.7 <sup>AB</sup>       |
| UL123    | 3.9±0.14 <sup>ABC</sup>  | 1.37±0.02 | 7.1                             | 8.0 <sup>ABC</sup> | 0.9 <sup>AB</sup>       |
| UL67     | 3.9±0.14 <sup>ABC</sup>  | 0.90±0.02 | 7.3                             | 8.1 <sup>ABC</sup> | 0.8 <sup>AB</sup>       |
| UL64     | 3.9±0.10 <sup>ABC</sup>  | 1.50±0.01 | 7.3                             | 8.5 <sup>ABC</sup> | 1.2 <sup>AB</sup>       |
| UL126    | 3.9±0.14 <sup>ABC</sup>  | 1.38±0.01 | 7.0                             | 8.0 <sup>ABC</sup> | 1.0 <sup>AB</sup>       |
| UL49     | 3.9±0.12 <sup>ABC</sup>  | 1.50±0.01 | 7.3                             | 8.5 <sup>ABC</sup> | 1.2 <sup>AB</sup>       |
| UL4      | 3.9±0.01 <sup>ABC</sup>  | 1.38±0.01 | 7.1                             | 8.6 <sup>BC</sup>  | 1.5 <sup>AB</sup>       |
| UL39     | 3.9±0.13 <sup>ABC</sup>  | 1.00±0.02 | 7.1                             | 7.5 <sup>ABC</sup> | 0.4 <sup>AB</sup>       |
| UL34     | 3.9±0.06 <sup>ABC</sup>  | 1.45±0.01 | 7.0                             | 8.1 <sup>ABC</sup> | 1.1 <sup>AB</sup>       |
| UL33     | 3.9±0.12 <sup>ABC</sup>  | 1.36±0.01 | 7.0                             | 8.2 <sup>ABC</sup> | 1.2 <sup>AB</sup>       |
| UL32     | 3.9±0.12 <sup>ABC</sup>  | 1.36±0.01 | 7.0                             | 8.2 <sup>ABC</sup> | 1.2 <sup>AB</sup>       |
| UL46     | 3.9±0.13 <sup>ABC</sup>  | 1.36±0.01 | 7.3                             | 8.0 <sup>ABC</sup> | 0.7 <sup>AB</sup>       |
| UL45     | 3.9±0.14 <sup>ABC</sup>  | 1.35±0.01 | 7.3                             | 8.2 <sup>ABC</sup> | 0.9 <sup>AB</sup>       |
| UL44     | 3.9±0.12 <sup>ABC</sup>  | 1.36±0.01 | 7.3                             | 8.2 <sup>ABC</sup> | 0.9 <sup>AB</sup>       |
| UL41     | 3.9±0.12 <sup>ABC</sup>  | 1.36±0.01 | 7.3                             | 8.2 <sup>ABC</sup> | 0.9 <sup>AB</sup>       |
| UL40     | 3.9±0.13 <sup>ABC</sup>  | 1.36±0.01 | 7.3                             | 7.7 <sup>ABC</sup> | 0.4 <sup>AB</sup>       |
| UL84     | 3.9±0.06 <sup>ABC</sup>  | 1.38±0.01 | 7.1                             | 8.0 <sup>ABC</sup> | 0.9 <sup>AB</sup>       |
| UL112    | 3.9±0.14 <sup>ABC</sup>  | 1.00±0.01 | 7.1                             | 7.5 <sup>ABC</sup> | 0.4 <sup>AB</sup>       |
| UL11     | 3.9±0.05 <sup>ABC</sup>  | 1.36±0.01 | 7.1                             | 8.6 <sup>BC</sup>  | 1.5 <sup>v</sup>        |
| UL106    | 3.9±0.08 <sup>ABC</sup>  | 1.00±0.01 | 7.0                             | 7.5 <sup>ABC</sup> | 0.5 <sup>AB</sup>       |
| UL108    | 3.9±0.14 <sup>ABC</sup>  | 1.00±0.01 | 7.0                             | 7.5 <sup>ABC</sup> | 0.5 <sup>AB</sup>       |
| UL92     | 3.9±0.06 <sup>ABC</sup>  | 1.38±0.01 | 7.0                             | 8.0 <sup>ABC</sup> | 1.0 <sup>AB</sup>       |
| UL76     | 3.9±0.12 <sup>ABC</sup>  | 1.37±0.01 | 7.3                             | 8.0 <sup>ABC</sup> | 0.7 <sup>AB</sup>       |
| UL96     | 3.9±0.10 <sup>ABC</sup>  | 1.38±0.01 | 7.1                             | 8.0 <sup>ABC</sup> | 0.9 <sup>AB</sup>       |
| UL78     | 3.9±0.06 <sup>ABC</sup>  | 1.45±0.01 | 7.1                             | 8.0 <sup>ABC</sup> | 0.9 <sup>AB</sup>       |
| UL10     | 3.9±0.14 <sup>ABC</sup>  | 1.38±0.01 | 7.0                             | 8.0 <sup>ABC</sup> | 1.0 <sup>AB</sup>       |
| UL101    | 3.9±0.10 <sup>ABC</sup>  | 1.00±0.01 | 7.0                             | 7.5 <sup>ABC</sup> | 0.5 <sup>AB</sup>       |
| UL25     | 3.9±0.12 <sup>ABC</sup>  | 1.36±0.01 | 7.0                             | 8.0 <sup>ABC</sup> | 1.0 <sup>AB</sup>       |
| UL27     | 3.9±0.13 <sup>ABC</sup>  | 1.37±0.01 | 7.1                             | 8.0 <sup>ABC</sup> | 0.9 <sup>AB</sup>       |
| UL20     | 3.9±0.13 <sup>ABC</sup>  | 1.35±0.01 | 7.2                             | 8.2 <sup>ABC</sup> | 1.0 <sup>AB</sup>       |
| UL82     | 4.0±0.12 <sup>ABCD</sup> | 1.26±0.01 | 7.0                             | 8.1 <sup>ABC</sup> | 1.1 <sup>AB</sup>       |
| UL83     | 4.0±0.10 <sup>ABCD</sup> | 1.26±0.01 | 7.1                             | 8.1 <sup>ABC</sup> | 1.0 <sup>AB</sup>       |
| UL90     | 4.0±0.14 <sup>ABCD</sup> | 0.8±0.01  | 7.0                             | 7.5 <sup>ABC</sup> | 0.5 <sup>AB</sup>       |
| UL98     | 4.0±0.10 <sup>ABCD</sup> | 1.3±0.01  | 7.0                             | 8.1 <sup>ABC</sup> | 1.0 <sup>AB</sup>       |
| UL71     | 4.0±0.12 <sup>ABCD</sup> | 0.8±0.01  | 7.1                             | 7.9 <sup>ABC</sup> | 0.8 <sup>AB</sup>       |
| UL73     | 4.0±0.14 <sup>ABCD</sup> | 1.4±0.01  | 7.1                             | 8.1 <sup>ABC</sup> | 1.0 <sup>AB</sup>       |
| UL6      | 4.0±0.09 <sup>ABCD</sup> | 1.0±0.02  | 7.2                             | 7.8 <sup>ABC</sup> | 0.6 <sup>AB</sup>       |
| UL53     | 4.0±0.06 <sup>ABCD</sup> | 1.26±0.01 | 7.1                             | 8.1 <sup>ABC</sup> | 1.0 <sup>AB</sup>       |

|       |               |           |     |                  |                   |
|-------|---------------|-----------|-----|------------------|-------------------|
| UL87  | 4.0±0.14 ABCD | 1.4±0.01  | 7.0 | 8.1 ABC          | 1.1 AB            |
| UL86  | 4.0±0.14 ABCD | 1.4±0.01  | 7.0 | 8.1 ABC          | 1.1 AB            |
| UL88  | 4.0±0.12 ABCD | 1.26±0.01 | 7.1 | 8.2 ABC          | 1.1 AB            |
| UL85  | 4.0±0.10 ABCD | 1.26±0.01 | 7.1 | 8.1 ABC          | 1.0 AB            |
| UL42  | 4.0±0.14 ABCD | 1.26±0.01 | 7.1 | 8.1 ABC          | 1.0 AB            |
| UL111 | 4.0±0.10 ABCD | 1.3±0.01  | 7.1 | 8.1 ABC          | 1.0 AB            |
| UL125 | 4.0±0.10 ABCD | 1.26±0.01 | 7.1 | 8.1 ABC          | 1.0 AB            |
| UL24  | 4.0±0.12 ABCD | 1.0±0.02  | 7.0 | 8.0 ABC          | 1.0 AB            |
| UL115 | 4.0±0.14 ABCD | 1.26±0.01 | 7.0 | 8.1 ABC          | 1.1 AB            |
| UL19  | 4.0±0.13 ABCD | 1.3±0.01  | 7.1 | 8.1 ABC          | 1.0 AB            |
| UL103 | 4.0±0.09 ABCD | 1.26±0.05 | 7.0 | 8.1 ABC          | 1.1 AB            |
| UL109 | 4.0±0.14 ABCD | 1.26±0.01 | 7.1 | 8.1 ABC          | 1.0 AB            |
| UL22  | 4.0±0.13 ABCD | 1.0±0.02  | 7.0 | 7.9 ABC          | 0.9 AB            |
| UL28  | 4.0±0.10 ABCD | 1.0±0.02  | 7.0 | 8.1 ABC          | 1.1 AB            |
| UL117 | 4.0±0.14 ABCD | 1.0±0.01  | 7.0 | 7.6 ABC          | 0.6 AB            |
| UL119 | 4.0±0.10 ABCD | 1.3±0.01  | 7.0 | 8.1 ABC          | 1.1 AB            |
| UL120 | 4.0±0.14 ABCD | 1.26±0.01 | 7.1 | 8.1 ABC          | 1.0 AB            |
| UL8   | 3.8±0.12 ABCD | 1.38±0.01 | 7.0 | 8.0 ABC          | 1.0 AB            |
| UL116 | 4.0±0.14 ABCD | 1.26±0.01 | 7.0 | 8.1 ABC          | 1.1 AB            |
| UL9   | 4.3±0.09 ABCD | 0.9±0.02  | 7.1 | 7.8 ABC          | 0.7 AB            |
| UL100 | 4.1±0.14 ABCD | 1.0±0.01  | 7.0 | 7.6 ABC          | 0.6 AB            |
| UL21  | 4.1±0.12 ABCD | 1.0±0.02  | 7.0 | 7.8 <sup>A</sup> | 0.8 AB            |
| UL81  | 4.2±0.14 ABCD | 1.4±0.01  | 7.0 | 8.1 ABC          | 1.1 AB            |
| UL16  | 4.2±0.12 ABCD | 0.7±0.01  | 7.1 | 8.0 ABC          | 0.9 AB            |
| UL91  | 4.2±0.14 ABCD | 0.9±0.01  | 7.0 | 8.5 ABC          | 1.5 AB            |
| UL79  | 4.2±0.13 ABCD | 0.9±0.02  | 7.0 | 7.5 ABC          | 0.5 AB            |
| UL38  | 4.2±0.12 ABCD | 0.7±0.01  | 7.1 | 6.9 <sup>A</sup> | -0.2 <sup>A</sup> |
| UL3   | 4.2±0.05 ABCD | 0.9±0.01  | 7.1 | 7.5 ABC          | 0.4 AB            |
| UL47  | 4.2±0.13 ABCD | 0.9±0.02  | 7.3 | 8.1 ABC          | 0.8 AB            |
| UL35  | 4.2±0.12 ABCD | 0.8±0.01  | 6.9 | 7.9 ABC          | 1.0 AB            |
| UL23  | 4.2±0.13 ABCD | 0.9±0.02  | 7.0 | 7.9 ABC          | 0.9 AB            |
| UL124 | 4.3±0.09 ABCD | 0.9±0.01  | 7.0 | 7.9 ABC          | 0.9 AB            |
| UL26  | 4.3±0.17 ABCD | 0.9±0.02  | 7.0 | 7.9 ABC          | 0.9 AB            |
| UL31  | 4.3±0.05 ABCD | 0.9±0.02  | 7.0 | 7.5 ABC          | 0.5 AB            |
| UL1   | 4.3±0.14 ABCD | 0.9±0.02  | 7.3 | 7.9 ABC          | 0.6 AB            |
| UL77  | 4.3±0.14 ABCD | 1.4±0.01  | 7.3 | 8.1 ABC          | 0.8 AB            |
| UL7   | 4.3±0.20 ABCD | 0.9±0.02  | 7.1 | 8.1 ABC          | 1.0 AB            |
| UL69  | 4.3±0.17 ABCD | 1.4±0.01  | 7.3 | 8.0 ABC          | 0.7 AB            |
| UL5   | 4.3±0.09 ABCD | 0.8±0.02  | 7.0 | 7.8 ABC          | 0.8 AB            |
| UL50  | 4.3±0.12 ABCD | 1.0±0.02  | 7.1 | 7.6 ABC          | 0.5 AB            |
| UL2   | 4.3±0.12 ABCD | 0.9±0.02  | 7.2 | 7.8 ABC          | 0.6 AB            |
| UL72  | 4.4±0.01 ABCD | 0.8±0.01  | 7.3 | 7.8 ABC          | 0.5 AB            |
| UL75  | 4.4±0.01 ABCD | 0.8±0.01  | 7.1 | 7.7 ABC          | 0.6 AB            |
| UL93  | 4.4±0.14 ABCD | 0.8±0.01  | 7.0 | 7.7 ABC          | 0.7 AB            |
| UL18  | 4.4±0.37 ABCD | 0.8±0.02  | 7.0 | 7.7 ABC          | 0.7 AB            |
| UL97  | 4.4±0.10 ABCD | 0.8±0.01  | 7.0 | 7.8 ABC          | 0.8 AB            |
| UL121 | 4.4±0.14 ABCD | 0.8±0.01  | 7.1 | 6.9 <sup>A</sup> | -0.2 <sup>A</sup> |
| UL105 | 4.4±0.10 ABCD | 0.8±0.01  | 7.1 | 7.9 ABC          | 0.8 AB            |
| UL95  | 4.4±0.14 ABCD | 0.8±0.01  | 7.0 | 7.9 ABC          | 0.9 AB            |
| UL114 | 4.4±0.14 ABCD | 0.8±0.01  | 7.0 | 6.9 <sup>A</sup> | -0.1 <sup>A</sup> |

|       |                          |          |     |                    |                   |
|-------|--------------------------|----------|-----|--------------------|-------------------|
| UL104 | 4.4±0.01 <sup>ABCD</sup> | 0.8±0.01 | 7.1 | 7.9 <sup>ABC</sup> | 0.8 <sup>AB</sup> |
| UL102 | 4.4±0.10 <sup>ABCD</sup> | 0.8±0.01 | 7.0 | 7.2 <sup>AB</sup>  | 0.2 <sup>AB</sup> |
| UL99  | 4.4±0.14 <sup>ABCD</sup> | 0.8±0.01 | 7.0 | 6.9 <sup>A</sup>   | -0.1 <sup>A</sup> |
| UL70  | 4.5±0.37 <sup>ABCD</sup> | 0.8±0.01 | 7.3 | 7.6 <sup>ABC</sup> | 0.3 <sup>AB</sup> |
| UL17  | 4.5±0.13 <sup>ABCD</sup> | 0.7±0.02 | 7.0 | 7.8 <sup>ABC</sup> | 0.8 <sup>AB</sup> |
| UL107 | 4.6±0.01 <sup>ABCD</sup> | 0.7±0.01 | 7.1 | 7.8 <sup>ABC</sup> | 0.7 <sup>AB</sup> |
| UL14  | 4.6±0.12 <sup>ABCD</sup> | 0.7±0.01 | 6.8 | 7.1 <sup>AB</sup>  | 0.3 <sup>AB</sup> |
| UL15  | 4.6±0.12 <sup>ABCD</sup> | 0.7±0.01 | 6.9 | 7.8 <sup>ABC</sup> | 0.9 <sup>AB</sup> |
| UL58  | 4.6±0.12 <sup>ABCD</sup> | 0.8±0.01 | 7.0 | 7.7 <sup>ABC</sup> | 0.7 <sup>AB</sup> |
| UL36  | 4.6±0.12 <sup>ABCD</sup> | 0.7±0.01 | 6.8 | 7.1 <sup>AB</sup>  | 0.3 <sup>AB</sup> |
| UL68  | 4.6±0.08 <sup>ABCD</sup> | 0.7±0.01 | 7.1 | 7.5 <sup>ABC</sup> | 0.4 <sup>AB</sup> |
| UL66  | 4.6±0.08 <sup>ABCD</sup> | 0.8±0.01 | 7.1 | 7.9 <sup>ABC</sup> | 0.8 <sup>AB</sup> |
| UL13  | 4.7±0.12 <sup>ABCD</sup> | 0.7±0.02 | 7.2 | 7.9 <sup>ABC</sup> | 0.7 <sup>AB</sup> |
| UL56  | 4.7±0.12 <sup>ABCD</sup> | 0.8±0.01 | 7.1 | 7.6 <sup>ABC</sup> | 0.5 <sup>AB</sup> |
| UL63  | 4.7±0.12 <sup>ABCD</sup> | 0.7±0.01 | 7.1 | 7.9 <sup>ABC</sup> | 0.8 <sup>AB</sup> |
| UL43  | 4.7±0.15 <sup>ABCD</sup> | 0.8±0.01 | 7.1 | 7.9 <sup>ABC</sup> | 0.8 <sup>AB</sup> |
| UL80  | 4.7±0.12 <sup>ABCD</sup> | 0.8±0.01 | 7.0 | 7.9 <sup>ABC</sup> | 0.9 <sup>AB</sup> |
| UL89  | 4.7±0.12 <sup>ABCD</sup> | 0.8±0.01 | 7.0 | 7.8 <sup>ABC</sup> | 0.8 <sup>AB</sup> |
| UL65  | 4.8±0.12 <sup>BCD</sup>  | 0.7±0.01 | 7.1 | 7.9 <sup>ABC</sup> | 0.8 <sup>AB</sup> |
| UL59  | 4.8±0.12 <sup>BCD</sup>  | 0.8±0.01 | 7.2 | 7.7 <sup>ABC</sup> | 0.5 <sup>AB</sup> |
| UL30  | 4.9±0.37 <sup>CD</sup>   | 0.6±0.01 | 7.0 | 8.1 <sup>ABC</sup> | 1.1 <sup>AB</sup> |
| UL37  | 4.9±0.37 <sup>CD</sup>   | 0.6±0.01 | 6.8 | 7.4 <sup>ABC</sup> | 0.6 <sup>AB</sup> |
| UL29  | 4.9±0.37 <sup>CD</sup>   | 0.6±0.02 | 6.8 | 7.5 <sup>ABC</sup> | 0.7 <sup>AB</sup> |
| UL52  | 4.9±0.37 <sup>CD</sup>   | 0.5±0.01 | 7.1 | 7.6 <sup>ABC</sup> | 0.5 <sup>AB</sup> |
| UL48  | 4.9±0.37 <sup>CD</sup>   | 0.6±0.01 | 7.3 | 8.5 <sup>ABC</sup> | 1.2 <sup>AB</sup> |
| UL62  | 5.0±0.37 <sup>D</sup>    | 0.6±0.01 | 7.1 | 7.6 <sup>ABC</sup> | 0.5 <sup>AB</sup> |

Test: Duncan  $\alpha = 0.05$  for factor interactions. Mean values  $\pm$  standard deviation. Means with common letter are not significantly different ( $P \leq 0.05$ ). t0: 0 hours; t24: 24 hours. <sup>1</sup>: Titratable Acidity (% w / v lactic acid); <sup>2</sup>: Viability (log CFU/mL) and <sup>3</sup>: Net growth (log CFU/mL t<sub>24</sub>-log CFU/mL t<sub>0</sub>). Shading indicates that strains showed better growth and a greater decrease in pH occurred at 24 h in MMS.
